# Supplementary material for: Sensor Validation and Diagnostic Potential of Smartwatches in Movement Disorders
Source: MDPI journal article supplement (doi:10.3390/s21093139), 2021-04-30
Supplement: s1 [file s1]

Table 1: Common abbreviations for the following population of the clinical trial.

| Abbreviation | Description                      | Translation             |
|--------------|----------------------------------|-------------------------|
| IPS          | Idiopathisches Parkinson Syndrom | Idiopathic Parkinsonism |
| THS          | Tiefe Hirnstimulation            | Deep Brain Stimulation  |
| Z.n.         | Zustand nach                     | Condition after         |

| Condition | Disease Comment                                                                                       | Age | Gender |
|-----------|-------------------------------------------------------------------------------------------------------|-----|--------|
| Healthy   |                                                                                                       | 65  | f      |
| Healthy   |                                                                                                       | 35  | f      |
| Healthy   |                                                                                                       | 49  | m      |
| Healthy   |                                                                                                       | 50  | f      |
| Healthy   |                                                                                                       | 42  | f      |
| Healthy   | Essential Tremor                                                                                      | 69  | m      |
| Healthy   |                                                                                                       | 56  | m      |
| Healthy   | Osteoarthritis                                                                                        | 75  | f      |
| Healthy   |                                                                                                       | 54  | f      |
| Healthy   |                                                                                                       | 79  | f      |
| Healthy   |                                                                                                       | 90  | m      |
| Healthy   |                                                                                                       | 88  | f      |
| Healthy   |                                                                                                       | 49  | m      |
| Healthy   |                                                                                                       | 48  | f      |
| Healthy   |                                                                                                       | 80  | m      |
| Healthy   |                                                                                                       | 84  | f      |
| Healthy   |                                                                                                       | 80  | m      |
| Healthy   |                                                                                                       | 67  | f      |
| Healthy   | Z. n. Breast cancer, Z. n. port associated thrombus,<br>Z.n. Lubar Vertebrae fracture, Hypothyroidism | 52  | f      |
| Healthy   |                                                                                                       | 48  | m      |
| Healthy   |                                                                                                       | 72  | f      |
| Healthy   |                                                                                                       | 54  | f      |
| Healthy   |                                                                                                       | 67  | f      |
| Healthy   |                                                                                                       | 44  | f      |
| Healthy   |                                                                                                       | 56  | m      |
| Healthy   |                                                                                                       | 63  | m      |
| Healthy   |                                                                                                       | 40  | m      |
| Healthy   |                                                                                                       | 56  | m      |
| Healthy   |                                                                                                       | 42  | f      |
| Healthy   |                                                                                                       | 48  | f      |
| Healthy   |                                                                                                       | 58  | f      |
| Healthy   |                                                                                                       | 76  | f      |
| Healthy   |                                                                                                       | 81  | m      |
| Healthy   |                                                                                                       | 76  | f      |
| Healthy   |                                                                                                       | 81  | m      |
| Healthy   |                                                                                                       | 51  | f      |
| Healthy   |                                                                                                       | 61  | f      |
| Healthy   |                                                                                                       | 38  | m      |
| Healthy   |                                                                                                       | 60  | m      |
| Healthy   |                                                                                                       | 64  | m      |
| Healthy   | Z. n. bacterial Meningitis                                                                            | 43  | f      |
| Healthy   | IPS mixed type                                                                                        | 64  | m      |
| Healthy   | Gait disorder of unknown etiology                                                                     | 52  | f      |
| Healthy   | Stiff Limb plus Syndrome                                                                              | 69  | f      |

|             |                                                                                            |    |   |
|-------------|--------------------------------------------------------------------------------------------|----|---|
| Healthy     | Segmental Dystonia and Myoclonus syndrome<br>Hypertonia, PCO, Diabetes mellitus II, Asthma | 66 | f |
| Healthy     |                                                                                            | 61 | f |
| Healthy     |                                                                                            | 40 | f |
| Healthy     | deafness right                                                                             | 67 | f |
| Healthy     |                                                                                            | 70 | m |
| Healthy     |                                                                                            | 71 | f |
| Healthy     |                                                                                            | 52 | f |
| Healthy     |                                                                                            | 45 | m |
| Healthy     |                                                                                            | 35 | m |
| Healthy     |                                                                                            | 65 | m |
| Healthy     |                                                                                            | 85 | m |
| Healthy     |                                                                                            | 40 | f |
| Healthy     |                                                                                            | 78 | f |
| Healthy     |                                                                                            | 61 | f |
| Healthy     |                                                                                            | 56 | m |
| Healthy     |                                                                                            | 68 | m |
| Healthy     |                                                                                            | 72 | f |
| Healthy     |                                                                                            | 38 | f |
| Healthy     |                                                                                            | 67 | m |
| Healthy     |                                                                                            | 55 | f |
| Healthy     |                                                                                            | 79 | f |
| Healthy     |                                                                                            | 61 | f |
| Healthy     |                                                                                            | 69 | f |
| Healthy     |                                                                                            | 77 | m |
| Healthy     |                                                                                            | 62 | f |
| Healthy     |                                                                                            | 61 | f |
| Healthy     |                                                                                            | 64 | m |
| Healthy     | Thyroid carcinoma<br>Hypertonia                                                            | 66 | f |
| Healthy     |                                                                                            | 58 | f |
| Healthy     |                                                                                            | 54 | f |
| Healthy     |                                                                                            | 71 | f |
| Healthy     |                                                                                            | 57 | m |
| Healthy     |                                                                                            | 49 | f |
| Healthy     |                                                                                            | 66 | f |
| Healthy     |                                                                                            | 63 | f |
| Healthy     |                                                                                            | 70 | f |
| Healthy     |                                                                                            | 60 | f |
| Healthy     |                                                                                            | 54 | f |
| Healthy     |                                                                                            | 83 | m |
| Healthy     |                                                                                            | 76 | f |
| Healthy     |                                                                                            | 57 | f |
| Healthy     |                                                                                            | 45 | f |
| Healthy     |                                                                                            | 48 | f |
| Healthy     |                                                                                            | 65 | m |
| Parkinson's | THS IPS tremordominant type                                                                | 51 | m |
| Parkinson's | IPS hypokinetic-rigid type                                                                 | 70 | m |
| Parkinson's | IPS mixed type                                                                             | 68 | m |
| Parkinson's | IPS akinetic-rigid type                                                                    | 72 | m |
| Parkinson's | IPS mixed type                                                                             | 57 | m |
| Parkinson's | IPS mixed type. THS                                                                        | 53 | m |
| Parkinson's | IPS hypokinetic-rigid type                                                                 | 78 | m |
| Parkinson's | IPS hypokinetic-rigid type                                                                 | 73 | m |
| Parkinson's | IPS akinetic-rigid type                                                                    | 72 | m |

|             |                                                                                          |    |   |
|-------------|------------------------------------------------------------------------------------------|----|---|
| Parkinson's | IPS mixed type                                                                           | 78 | m |
| Parkinson's | IPS tremordominant type. V.a. Restless-Legs-Syndrom. THS                                 | 59 | m |
| Parkinson's | IPS hypokinetic-rigid type                                                               | 84 | m |
| Parkinson's | IPS akinetic-rigid type                                                                  | 80 | m |
| Parkinson's | IPS hypokinetic-rigid type                                                               | 59 | m |
| Parkinson's | IPS akinetic-rigid type                                                                  | 51 | m |
| Parkinson's | IPS tremordominant type                                                                  | 75 | m |
| Parkinson's |                                                                                          | 75 | m |
| Parkinson's | IPS hypokinetic-rigid type                                                               | 73 | m |
| Parkinson's |                                                                                          | 75 | m |
| Parkinson's | IPS mixed type. THS                                                                      | 47 | m |
| Parkinson's |                                                                                          | 55 | f |
| Parkinson's |                                                                                          | 65 | m |
| Parkinson's | Periodic movement of legs while asleep, mostly uncorrelated Arousals. Lewy-Body-Dementia | 59 | m |
| Parkinson's | IPS akinetic-rigid type                                                                  | 75 | m |
| Parkinson's | IPS akinetic-rigid type                                                                  | 71 | m |
| Parkinson's | IPS mixed type                                                                           | 68 | m |
| Parkinson's | IPS akinetic-rigid type                                                                  | 67 | m |
| Parkinson's | IPS tremordominant type                                                                  | 59 | m |
| Parkinson's | IPS hypokinetic-rigid type                                                               | 53 | f |
| Parkinson's | IPS hypokinetic-rigid type                                                               | 56 | f |
| Parkinson's | IPS hypokinetic-rigid type                                                               | 74 | m |
| Parkinson's | IPS mixed type. THS. Essential Tremor                                                    | 47 | m |
| Parkinson's | IPS akinetic-rigid type                                                                  | 63 | f |
| Parkinson's | IPS mixed type                                                                           | 67 | m |
| Parkinson's | IPS hypokinetic-rigid type                                                               | 74 | m |
| Parkinson's | IPS hypokinetic-rigid type                                                               | 55 | m |
| Parkinson's | IPS akinetic-rigid type                                                                  | 65 | f |
| Parkinson's | tremordominant type                                                                      | 75 | f |
| Parkinson's | tremordominant type SWEDD                                                                | 56 | m |
| Parkinson's | mixed type. THS                                                                          | 56 | m |
| Parkinson's | mixed type                                                                               | 77 | m |
| Parkinson's | IPS hypokinetic-rigid type                                                               | 77 | m |
| Parkinson's | IPS                                                                                      | 61 | m |
| Parkinson's | IPS hypokinetic-rigid type                                                               | 71 | m |
| Parkinson's | IPS mixed type                                                                           | 53 | m |
| Parkinson's | IPS tremordominant type. Resting tremor right                                            | 82 | f |
| Parkinson's | IPS hypokinetic-rigid type                                                               | 69 | m |
| Parkinson's | iPS hypokinetic-rigid type                                                               | 64 | m |
| Parkinson's | IPS hypokinetic-rigid type                                                               | 63 | f |
| Parkinson's | IPS hypokinetic-rigid type                                                               | 65 | f |
| Parkinson's | IPS hypokinetic-rigid type THS                                                           | 73 | f |
| Parkinson's | IPS mixed type                                                                           | 57 | f |
| Parkinson's | iPS von hypokinetisch rigiden Typ                                                        | 71 | f |
| Parkinson's | IPS mixed type                                                                           | 62 | m |
| Parkinson's | IPS mixed type                                                                           | 83 | m |
| Parkinson's | IPS hypokinetic-rigid type                                                               | 77 | m |
| Parkinson's | IPS hypokinetic-rigid type                                                               | 65 | m |
| Parkinson's | IPS mixed type                                                                           | 64 | m |
| Parkinson's | IPS mixed type                                                                           | 57 | f |
| Parkinson's | IPS tremordominant type                                                                  | 58 | f |

|             |                                                                    |    |   |
|-------------|--------------------------------------------------------------------|----|---|
| Parkinson's | IPS hypokinetic-rigid type                                         | 75 | m |
| Parkinson's | IPS mixed type                                                     | 74 | m |
| Parkinson's | Multiple System Atrophy of Parkinson-Type                          | 71 | m |
| Parkinson's | IPS tremordominant type                                            | 71 | m |
| Parkinson's | IPS tremordominant type                                            | 63 | m |
| Parkinson's | IPS mixed type. THS                                                | 61 | f |
| Parkinson's | IPS tremordominant type. Essential Tremor                          | 78 | m |
| Parkinson's | IPS mixed type. Essential Tremor                                   | 74 | m |
| Parkinson's | IPS hypokinetic-rigid type Hypertonia                              | 70 | m |
| Parkinson's | IPS akinetic-rigid type                                            | 75 | m |
| Parkinson's | IPS mixed type. Restless-Legs-Syndrom                              | 83 | f |
| Parkinson's | IPS mixed type                                                     | 63 | f |
| Parkinson's | IPS akinetic-rigid type                                            | 67 | f |
| Parkinson's | IPS tremordominant type. Restless Legs-Syndrom                     | 63 | f |
| Parkinson's | IPS akinetic-rigid type                                            | 79 | f |
| Parkinson's | iPS mixed type                                                     | 70 | f |
| Parkinson's | IPS akinetic-rigid type                                            | 54 | f |
| Parkinson's | IPS akinetic-rigid type. THS                                       | 54 | m |
| Parkinson's | IPS tremordominant type DD monosymptomatic tremor                  | 72 | m |
| Parkinson's | IPS hypokinetic-rigid type                                         | 65 | m |
| Parkinson's | IPS akinetic-rigid type                                            | 54 | m |
| Parkinson's | IPS hypokinetic-rigid type                                         | 74 | m |
| Parkinson's | IPS akinetic-rigid type                                            | 51 | f |
| Parkinson's | IPS mixed type. Restless-Legs-Syndrome                             | 81 | f |
| Parkinson's | IPS tremordominant type                                            | 69 | m |
| Parkinson's | IPS akinetic-rigid type. THS                                       | 65 | m |
| Parkinson's | IPS mixed type of unknown classification, DD: vascular, idiopathic | 56 | f |
| Parkinson's | IPS tremordominant type                                            | 80 | f |
| Parkinson's | IPS akinetic-rigid type                                            | 66 | f |
| Parkinson's | IPS mixed type. Essential Tremor                                   | 88 | m |
| Parkinson's | IPS, not yet medicated                                             | 55 | f |
| Parkinson's | IPS tremordominant type                                            | 67 | m |
| Parkinson's |                                                                    | 49 | m |
| Parkinson's | IPS tremordominant type. Restless-Legs-Syndrome                    | 58 | m |
| Parkinson's | IPS akinetc rigid type                                             | 55 | f |
| Parkinson's | IPS mixed type                                                     | 65 | m |
| Parkinson's | IPS vom akinetc rigid type                                         | 74 | m |
| Parkinson's | IPS mixed type                                                     | 68 | m |
| Parkinson's | IPS vom hypokinetc rigid type                                      | 78 | f |
| Parkinson's | IPS mixed type                                                     | 79 | f |
| Parkinson's | IPS mixed type                                                     | 65 | f |
| Parkinson's | IPS mixed type THS                                                 | 49 | m |
| Parkinson's | IPS mixed type. THS                                                | 69 | m |
| Parkinson's | IPS with dystonia                                                  | 42 | m |
| Parkinson's | IPS akinetc rigid type                                             | 78 | m |
| Parkinson's | IPS mixed type                                                     | 68 | f |
| Parkinson's | IPS tremordominant type                                            | 61 | m |
| Parkinson's | IPS tremordominant type                                            | 73 | m |
| Parkinson's | IPS mixed type                                                     | 70 | f |
| Parkinson's | IPS mixed type                                                     | 68 | m |
| Parkinson's | Vascular L-Dopa-responsives. hypokinetic rigid parkinsonism        | 67 | m |
| Parkinson's | IPS tremordominant type                                            | 72 | m |

|             |                                                                         |    |   |
|-------------|-------------------------------------------------------------------------|----|---|
| Parkinson's | IPS hypokinetic-rigid type                                              | 77 | m |
| Parkinson's | IPS tremordominant type                                                 | 68 | m |
| Parkinson's | IPS hypokinetic-rigid type                                              | 64 | m |
| Parkinson's | IPS mixed type                                                          | 69 | f |
| Parkinson's | IPS hypokinetic-rigid type, z. N. endocarditis                          | 66 | m |
| Parkinson's | IPS vom akinetisch rigider Typ                                          | 64 | m |
| Parkinson's | IPS tremordominant type                                                 | 60 | m |
| Parkinson's | IPS mixed type                                                          | 79 | m |
| Parkinson's | IPS vom akinetisch rigider Typ                                          | 69 | m |
| Parkinson's | IPS akinetic-rigid type                                                 | 68 | m |
| Parkinson's | Ips tremordominant type                                                 | 81 | m |
| Parkinson's | Ips hypokinetic-rigid type THS                                          | 56 | m |
| Parkinson's | IPS akinetic-rigid type                                                 | 78 | f |
| Parkinson's | Starting IPS tremordominant type                                        | 47 | m |
| Parkinson's |                                                                         | 70 | m |
| Parkinson's | Ips mixed type                                                          | 73 | f |
| Parkinson's | Ips mixed type THS                                                      | 78 | m |
| Parkinson's | IPS hypokinetic-rigid type                                              | 51 | f |
| Parkinson's | IPS tremordominant type                                                 | 78 | m |
| Parkinson's | Atypical Parkinsonism with orthostatic dysregulation                    | 74 | m |
| Parkinson's | IPS tremordominant type                                                 | 62 | m |
| Parkinson's | IPS akinetic-rigid type                                                 | 63 | m |
| Parkinson's | IPS hypokinetic-rigid type                                              | 73 | m |
| Parkinson's | IPS hypokinetic-rigid type                                              | 74 | m |
| Parkinson's | IPS akinetic-rigid type                                                 | 78 | m |
| Parkinson's | IPS mixed type. Severely pronounced Restless-Legs-Syndrome. THS         | 68 | m |
| Parkinson's | IPS mixed type                                                          | 66 | m |
| Parkinson's | IPS mixed type                                                          | 64 | m |
| Parkinson's | Hypertonie                                                              | 87 | m |
| Parkinson's | IPS hypokinetic-rigid type                                              | 47 | m |
| Parkinson's | IPS hypokinetic-rigid type                                              | 75 | m |
| Parkinson's | IPS mixed type. Restless-Legs-Syndrome                                  | 67 | f |
| Parkinson's | IPS tremordominant type                                                 | 66 | m |
| Parkinson's | IPS mixed type                                                          | 67 | m |
| Parkinson's | Parkinsonism with right-sided rigor and tremor of the upper extremities | 76 | m |
| Parkinson's | IPS mixed type                                                          | 66 | m |
| Parkinson's | IPS akinetic-rigid type                                                 | 49 | m |
| Parkinson's | IPS akinetic-rigid type                                                 | 67 | m |
| Parkinson's | IPS mixed type Ausgeprägte orthostatische Dysregulation                 | 73 | f |
| Parkinson's | Hypokinetic-rigid Type. Left-sided. DD atypical parkinsonism            | 63 | f |
| Parkinson's | IPS mixed type                                                          | 75 | m |
| Parkinson's | IPS mixed type                                                          | 53 | m |
| Parkinson's | IPS mixed type                                                          | 55 | m |
| Parkinson's | IPS mixed type                                                          | 62 | m |
| Parkinson's | IPS tremordominant type. Symptomatic Restless-Legs-Syndrome             | 85 | m |
| Parkinson's | IPS mixed type                                                          | 74 | f |
| Parkinson's | Ips tremordominant type                                                 | 71 | m |
| Parkinson's | IPS tremordominant type                                                 | 66 | f |

|             |                                                                                                                           |    |   |
|-------------|---------------------------------------------------------------------------------------------------------------------------|----|---|
| Parkinson's | IPS hypokinetic-rigid type, no tremor. THS                                                                                | 58 | f |
| Parkinson's | IPS tremordominant type, distinctive tremor in whole left arm. THS. The device for THS was deactivated before measurement | 46 | m |
| Parkinson's | IPS akinetic-rigid type. THS                                                                                              | 54 | f |
| Parkinson's | IPS mixed type                                                                                                            | 69 | m |
| Parkinson's | IPS mixed type. Paralysis of the right arm                                                                                | 62 | m |
| Parkinson's | IPS mixed type THS                                                                                                        | 63 | m |
| Parkinson's | IPS mixed type                                                                                                            | 71 | m |
| Parkinson's | IPS akinetic-rigid type                                                                                                   | 71 | m |
| Parkinson's | Ips akinetic-rigid type. THS                                                                                              | 75 | f |
| Parkinson's | IPS mixed type                                                                                                            | 78 | m |
| Parkinson's | IPS mixed type                                                                                                            | 78 | m |
| Parkinson's | IPS hypokinetic-rigid type                                                                                                | 55 | m |
| Parkinson's | IPS tremordominant type                                                                                                   | 50 | f |
| Parkinson's | IPS tremordominant type                                                                                                   | 54 | f |
| Parkinson's | IPS hypokinetic-rigid type                                                                                                | 70 | m |
| Parkinson's | IPS akinetic-rigid type                                                                                                   | 56 | m |
| Parkinson's | IPS mixed type. THS                                                                                                       | 58 | m |
| Parkinson's | iPS hypokinetic-rigid type                                                                                                | 60 | f |
| Parkinson's | Ips akinetic-rigid type                                                                                                   | 59 | m |
| Parkinson's | Ips akinetic-rigid type                                                                                                   | 66 | m |
| Parkinson's | IPS hypokinetic-rigid type                                                                                                | 67 | m |
| Parkinson's | IPS tremordominant type. Severe secondary Restless-Legs-Syndrome                                                          | 65 | m |
| Parkinson's | IPS mixed type. THS                                                                                                       | 78 | m |
| Parkinson's | IPS hypokinetic-rigid type                                                                                                | 47 | f |
| Parkinson's | IPS hypokinetic-rigid type                                                                                                | 69 | m |
| Parkinson's | IPS mixed type                                                                                                            | 80 | m |
| Parkinson's | IPS akinetic-rigid type                                                                                                   | 78 | m |
| Parkinson's | IPS akinetic-rigid type                                                                                                   | 64 | f |
| Parkinson's | IPS akinetic-rigid type                                                                                                   | 70 | m |
| Parkinson's | IPS hypokinetic-rigid type. THS                                                                                           | 51 | m |
| Parkinson's | IPS hypokinetic-rigid type                                                                                                | 70 | m |
| Parkinson's | IPS mixed type. Periodic movement of legs while asleep                                                                    | 74 | m |
| Parkinson's | IPS tremordominant type                                                                                                   | 53 | m |
| Parkinson's | IPS hypokinetic-rigid type                                                                                                | 53 | m |
| Parkinson's | IPS akinetic-rigid type                                                                                                   | 46 | f |
| Parkinson's | IPS. Secondary progressive multiple sklerosis                                                                             | 57 | m |
| Parkinson's | IPS mixed type                                                                                                            | 73 | m |
| Parkinson's | IPS hypokinetic-rigid type. THS                                                                                           | 67 | m |
| Parkinson's | IPS mixed type                                                                                                            | 73 | m |
| Parkinson's | IPS mixed type                                                                                                            | 66 | m |
| Parkinson's | IPS mixed type. THS                                                                                                       | 66 | m |
| Parkinson's | IPS tremordominant type                                                                                                   | 64 | m |
| Parkinson's | IPS hypokinetic-rigid type. THS                                                                                           | 61 | m |
| Parkinson's | IPS mixed type                                                                                                            | 52 | m |
| Parkinson's | IPS tremordominant type                                                                                                   | 54 | f |
| Parkinson's | IPS mixed type                                                                                                            | 61 | m |
| Parkinson's | IPS tremordominant type                                                                                                   | 72 | f |
| Parkinson's | IPS tremordominant type. THS                                                                                              | 51 | m |
| Parkinson's | IPS mixed type                                                                                                            | 65 | m |
| Parkinson's | IPS hypokinetic-rigid type                                                                                                | 56 | m |
| Parkinson's | IPS tremordominant type                                                                                                   | 72 | m |

|                  |                                                                                                                   |    |   |
|------------------|-------------------------------------------------------------------------------------------------------------------|----|---|
| Parkinson's      | IPS tremordominant type                                                                                           | 53 | m |
| Parkinson's      | IPS tremordominant type                                                                                           | 67 | f |
| Parkinson's      | IPS mit zunehmender Gangstörung und Sturzneigung                                                                  | 65 | m |
| Parkinson's      | IPS tremordominant type                                                                                           | 75 | m |
| Parkinson's      | IPS tremordominant type                                                                                           | 77 | f |
| Parkinson's      | IPS hypokinetic-rigid type. THS                                                                                   | 61 | m |
| Parkinson's      | IPS hypokinetic rigid Typ                                                                                         | 69 | m |
| Parkinson's      | Ips hypokinetic rigid Typ                                                                                         | 49 | f |
| Parkinson's      | Ips mixed type                                                                                                    | 79 | f |
| Parkinson's      | IPS tremordominant type                                                                                           | 77 | m |
| Parkinson's      | IPS akinetic-rigid type                                                                                           | 69 | f |
| Parkinson's      | IPS mixed type                                                                                                    | 72 | m |
| Parkinson's      | IPS tremordominant type                                                                                           | 70 | f |
| Parkinson's      | IPS tremordominant type                                                                                           | 75 | m |
| Parkinson's      | IPS hypokinetic rigid Typ                                                                                         | 81 | m |
| Parkinson's      | IPS DD MSA                                                                                                        | 63 | m |
| Parkinson's      | IPS akinetic rigid type                                                                                           | 58 | f |
| Parkinson's      | IPS mixed type                                                                                                    | 70 | f |
| Parkinson's      |                                                                                                                   | 63 | m |
| Parkinson's      | IPS + THS                                                                                                         | 48 | m |
| Parkinson's      | IPS Tremordominanztyp mit THS                                                                                     | 55 | f |
| Parkinson's      | iPS hypokinetic-rigid type. THS before optimization                                                               | 61 | m |
| Parkinson's      | IPS hypokinetic-rigid type THS                                                                                    | 49 | f |
| Parkinson's      | IPS DD Essential Tremor                                                                                           | 69 | m |
| Parkinson's      | IPS tremordominant type                                                                                           | 42 | f |
| Parkinson's      | IPS mixed type                                                                                                    | 76 | m |
| Parkinson's      | IPS akinetic-rigid type, THS, Duodopapump                                                                         | 57 | f |
| Parkinson's      | IPS hypokinetic rigid type                                                                                        | 72 | m |
| Parkinson's      | Z.n. Operation after spinal disc herniation Z.n. Hemilaminectomy and revision Z.n. Fracture of humerus head right | 66 | m |
| Parkinson's      | Diabetes mellitus. Polyneuropathy. Restless-Legs syndrome                                                         | 73 | f |
| Parkinson's      | IPS mixed type, THS: ja                                                                                           | 50 | m |
| Parkinson's      | IPS hypokinetic-rigid type. Test of Duodopapump                                                                   | 76 | f |
| Parkinson's      | IPS tremordominant type. Z.n. THS                                                                                 | 56 | m |
| Parkinson's      | IPS mixed type                                                                                                    | 71 | m |
| Parkinson's      | IPS hypokinetic-rigid type                                                                                        | 69 | m |
| Parkinson's      | IPS hypokinetic-rigid type. Z.n. Duodopapump                                                                      | 72 | f |
| Parkinson's      | Starting IPS                                                                                                      | 85 | m |
| Parkinson's      | IPS hypokinetic-rigid type, full Dyskinesia                                                                       | 67 | f |
| Parkinson's      |                                                                                                                   | 76 | m |
| Parkinson's      | Multiple System Atrophy of Parkinson-Type                                                                         | 64 | m |
| Parkinson's      | Multiple System Atrophy of Parkinson-Type                                                                         | 61 | f |
| Parkinson's      | IPS akinetic-rigid Type                                                                                           | 68 | f |
| Parkinson's      | IPS akinetic-rigid type                                                                                           | 66 | m |
| Parkinson's      | Essential Tremor DD IPS                                                                                           | 69 | m |
| Parkinson's      | Essential Tremor DD IPS                                                                                           | 69 | m |
| Essential Tremor | Essential Tremor                                                                                                  | 57 | m |
| Essential Tremor | Essential Tremor. THS                                                                                             | 70 | m |
| Essential Tremor | Essential Tremor                                                                                                  | 78 | f |
| Essential Tremor | Essential Tremor. THS                                                                                             | 59 | f |
| Essential Tremor | Essential Tremor                                                                                                  | 63 | m |

|                          |                                                                                                               |    |   |
|--------------------------|---------------------------------------------------------------------------------------------------------------|----|---|
| Essential Tremor         | Essential Tremor                                                                                              | 69 | m |
| Essential Tremor         | Essential Tremor                                                                                              | 54 | m |
| Essential Tremor         | ET THS                                                                                                        | 79 | m |
| Essential Tremor         | ET and oromandibular dystonia. Risperidon-associated                                                          | 70 | m |
| Essential Tremor         | Essential Tremor of head and hands. THS                                                                       | 61 | f |
| Essential Tremor         | Essential Tremor                                                                                              | 64 | f |
| Essential Tremor         | Essential Tremor                                                                                              | 72 | m |
| Essential Tremor         | Essential Tremor. Periodic leg movement while awake and asleep. Restless-Legs-Syndrome during iron deficiency | 72 | m |
| Essential Tremor         | THS                                                                                                           | 61 | m |
| Essential Tremor         |                                                                                                               | 52 | f |
| Essential Tremor         | THS                                                                                                           | 82 | m |
| Essential Tremor         |                                                                                                               | 79 | f |
| Essential Tremor         |                                                                                                               | 64 | m |
| Essential Tremor         |                                                                                                               | 45 | f |
| Essential Tremor         |                                                                                                               | 77 | f |
| Essential Tremor         |                                                                                                               | 49 | m |
| Essential Tremor         |                                                                                                               | 62 | m |
| Essential Tremor         | Z.n. THS. Before optimization of THS                                                                          | 50 | f |
| Essential Tremor         | Z.n. THS. Before optimization of THS                                                                          | 78 | f |
| Essential Tremor         | Temporal lobe epilepsy                                                                                        | 57 | f |
| Essential Tremor         | ET since he remembers. Diagnosed 08/2018. Additionally Alzheimer's Disease                                    | 64 | m |
| Other Movement Disorders | Swedd                                                                                                         | 41 | f |
| Other Movement Disorders | multiple sklerosis                                                                                            | 67 | f |
| Other Movement Disorders | MSA-C                                                                                                         | 67 | f |
| Other Movement Disorders | Idiopathic generalized dystonia. THS                                                                          | 66 | f |
| Other Movement Disorders | Tardive dyskinesia after neuroleptic therapy                                                                  | 53 | f |
| Other Movement Disorders | Dystonia-Parkinson-Syndrome, maybe genetically                                                                | 51 | m |
| Other Movement Disorders | Tremor with unknown cause DD Alzheimer's Disease                                                              | 83 | f |
| Other Movement Disorders | Atypical PD DD PSP                                                                                            | 79 | m |
| Other Movement Disorders | Multiple System Atrophy of Parkinson-Type (MSA-P)                                                             | 58 | m |
| Other Movement Disorders | L-Dopa-responsive dystonia                                                                                    | 51 | f |
| Other Movement Disorders | Left-Sided resting tremor and hypokinesia without presynaptic striatal deficit                                | 81 | m |
| Other Movement Disorders | Functional movement disorder. Likely caused by chronic pain syndrome                                          | 33 | m |
| Other Movement Disorders | Lewy-Body disease with posture tremor                                                                         | 73 | m |
| Other Movement Disorders | Starting IPS DD age dependent tremor DD asymmetric Essential Tremor                                           | 69 | m |
| Other Movement Disorders | MSA of cerebellar type                                                                                        | 67 | m |
| Other Movement Disorders | Drug-induced tremor. Maybe Valproat                                                                           | 60 | f |
| Other Movement Disorders | Dystonial tremor of the head. Anamnestic also generalized tremor/dystonia                                     | 41 | f |
| Other Movement Disorders | Hypoxic brain damage in childhood with symptomatic generalized dystonia, left sided. THS                      | 52 | m |
| Other Movement Disorders | Idiopathic polyneuropathy with ataxy and tremor - DD hereditary DD inflammatory                               | 65 | f |
| Other Movement Disorders | Leukoencephalopathy of unknown etiology                                                                       | 48 | f |
| Other Movement Disorders | Maybe normal-pressure-hydrocephalus. DD starting IPS                                                          | 63 | m |
| Other Movement Disorders | Paroxysmal kinesigenic dyskinesia                                                                             | 33 | f |

|                          |                                                                                            |    |   |
|--------------------------|--------------------------------------------------------------------------------------------|----|---|
| Other Movement Disorders | IPS akinetic-rigid type DD PSP of Parkinson type                                           | 77 | m |
| Other Movement Disorders | Asymmetric tremor of the hand of unknown etiology                                          | 59 | f |
| Other Movement Disorders | Progressive supranuclear conjugate gaze palsy a.e. type Richardson. Restless Legs Syndrome | 74 | f |
| Other Movement Disorders | Segmental dystonia. THS                                                                    | 46 | f |
| Other Movement Disorders | Restless-Legs-Syndrome                                                                     | 69 | f |
| Other Movement Disorders | Multiple Sklerosis                                                                         | 55 | m |
| Other Movement Disorders | Spinocerebellar syndrome with cerebral atrophy. intention tremor both-sided asymmetric     | 69 | m |
| Other Movement Disorders | Dystonic tremor                                                                            | 85 | f |
| Other Movement Disorders | Segmental dystonia                                                                         | 60 | m |
| Other Movement Disorders | Multiple System Atrophy of Combined-Type                                                   | 77 | f |
| Other Movement Disorders | Cervical dystonia                                                                          | 68 | m |
| Other Movement Disorders | Multiple Sklerosis of relapsing type                                                       | 49 | f |
| Other Movement Disorders | Dystonia of unknown etiology                                                               | 51 | f |
| Other Movement Disorders | Left-sided tremor. Maybe increased physiological tremor                                    | 69 | m |
| Other Movement Disorders | Clinically diagnosed L-Dopa responsive dystonia                                            | 52 | f |
| Other Movement Disorders | Multiple Sklerosis of relapsing type                                                       | 37 | m |
| Other Movement Disorders | MSA of Parkinson type                                                                      | 67 | f |
| Other Movement Disorders | Mild cervical dystonia                                                                     | 55 | f |
| Other Movement Disorders | Generalized dystonic movement disorder. THS                                                | 35 | f |
| Other Movement Disorders | Dystonic movement disorder. Tremor of the head. Torticollis to the right. THS              | 56 | f |
| Other Movement Disorders | Chorea minor Sydenham                                                                      | 48 | f |
| Other Movement Disorders | Multiple Sklerosis                                                                         | 51 | m |
| Other Movement Disorders | Multiple Sklerosis of relapsing type                                                       | 54 | m |
| Other Movement Disorders | Multiple Sklerosis of primary-progressive type                                             | 62 | m |
| Other Movement Disorders | Multiple Sklerosis of relapsing type                                                       | 60 | f |
| Other Movement Disorders | Cervical dystonia with rotatory Torticollis to the right side and Retrocollis. THS         | 69 | m |
| Other Movement Disorders | Cervical dystonia with Torticollis with tremor. Essential Tremor                           | 72 | m |
| Other Movement Disorders | Adult multifocal dystonia of unknown etiology                                              | 44 | f |
| Other Movement Disorders | Cervical dystonia. THS                                                                     | 56 | f |
| Other Movement Disorders | Multiple Sklerosis of secondary progressive type                                           | 40 | m |
| Other Movement Disorders | Segmental orofacial dystonia with blepharospasm. THS                                       | 77 | f |
| Other Movement Disorders | Torticollis to the left with dystonic tremor                                               | 54 | f |
| Other Movement Disorders |                                                                                            | 45 | f |
| Other Movement Disorders |                                                                                            | 53 | m |
| Other Movement Disorders | Torticollis to the left with dystonic tremor                                               | 54 | f |
| Other Movement Disorders | Unknown Tremor, especially of the head                                                     | 80 | f |
| Other Movement Disorders | Coarse resting tremor right with unknown cause                                             | 56 | f |
| Other Movement Disorders | ET DD functional tremor right arm and mild tremor of the head                              | 42 | f |
| Other Movement Disorders | Asthma bronchiale Z.n. Pericardial effusion                                                | 21 | f |
| Other Movement Disorders | Right dominant tremor. Maybe Lithium-associated                                            | 68 | m |
| Other Movement Disorders | Cervical dystonia                                                                          | 69 | m |
